# Supplementary material for: Yersinia pseudotuberculosis YopJ Limits Macrophage Response by Downregulating COX-2-Mediated Biosynthesis of PGE2 in a MAPK/ERK-Dependent Manner
Source: PubMed Central journal article supplement (PMC8552654; doi:10.1128/spectrum.00496-21), 2021-07-28

## Supplementary material:

**Fig. S1. Volcano plot showing graphical representation of quantitative proteomics data.** Proteins were ranked in a volcano plot according to their statistical P-value (y-axis) and relative abundance ratio (log<sub>2</sub> fold change) between YopJC172A *Y. pseudotuberculosis*-infected and wild-type *Y. pseudotuberculosis*-infected samples (x-axis).

**Fig. S2. (A, B).** Oxidative phosphorylation as one of top canonical pathways in proteins differentially abundant in YopJC172A mutant of *Y. pseudotuberculosis*-infected macrophages in comparison to wild-type *Y. pseudotuberculosis*. The graphs represent down-regulated proteins (green), upregulated proteins (red), and proteins with unchanged abundance (gray). **(C).** The upstream regulator identified in YopJC172A *Y. pseudotuberculosis*-infected macrophages in comparison to wild-type *Y. pseudotuberculosis*. The graphs represent down-regulated proteins (green), upregulated proteins (red), while the molecules shown in orange are predicted to be activated, and orange lines indicate direct inhibition.

**Fig. S3. The YopJ function in modulating PGE<sub>2</sub> biosynthesis in *Y. pseudotuberculosis*-infected THP-1 macrophages.** PMA-differentiated THP-1 macrophages were infected with live wild-type *Y. pseudotuberculosis* (Yptb),  $\Delta yopB$ , YopJC172A, or YopJC172A mutant expressing YopJ (YopJ-M45) at an MOI of 50:1 for two hours. YopJC172A + pYopJ-M45 strain was grown in the presence of 0.1 mM IPTG before infection. Alternatively, cells were treated with heat-killed  $\Delta yopB$  *Y. pseudotuberculosis*, or LPS from *Salmonella* (ST LPS), or *Y. pseudotuberculosis* (Yptb LPS). PGE<sub>2</sub> concentration in cell culture supernatants was measured using monoclonal ELISA. One-way ANOVA and Tukey's post hoc test were used to calculate significance (n=3). p-values were indicated as follows: \*p  $\leq$  0.05; \*\*p  $\leq$  0.01; \*\*\*p  $\leq$  0.001; \*\*\*\*p  $\leq$  0.0001.

**Fig. S4. OspB/OspF from *Shigella flexneri* 2457T 2a supports COX-2 mRNA transcription in THP-1-derived human macrophages in response to infection.** THP-1 macrophages were infected with wild-type, virulence plasmid deficient,  $\Delta ospB$ ,  $\Delta ospF$ , or  $\Delta ospB \Delta ospF$  *Shigella flexneri* 2a at an MOI of 15:1 for 2 hours. 2 hours post-infection cell pellets were isolated and total RNA was collected via Qiagen RNeasy kit. RT-PCR analysis was performed on COX-2

transcripts and normalized to GAPDH reference gene before comparing to uninfected vehicle control. Statistical significance was calculated using the student's T-test, and p-values were indicated as follows: \*p ≤ 0.05; \*\*p ≤ 0.01; \*\*\*p ≤ 0.001; \*\*\*\*p ≤ 0.0001. The data shown are representative of three experiments.

**Table S1. Shotgun proteomics and pathway analysis of THP-1 macrophages infected with wild-type or YopJC172A mutant *Y. pseudotuberculosis*: Human proteins identified in YopJC172A *Yersinia pseudotuberculosis* -infected THP-1 macrophages in comparison to wild-type *Yersinia* infected macrophages (tab 1), or wild-type *Yersinia* infected macrophages in comparison to uninfected control cells (tab 2).** The table includes a gene symbol, Entrez gene name, Protein accession number, experimental p-value calculated by using t-test, and experimental fold change value calculated based on the normalized and weighted spectral count. Protein location, molecule type, and Entrez Gene ID for Human genes are also shown.

**Table S2. Shotgun proteomics and pathway analysis of THP-1 macrophages infected with wild-type or YopJC172A mutant *Y. pseudotuberculosis*: *Yersinia* proteins in YopJC172A *Yersinia pseudotuberculosis*-infected THP-1 macrophages in comparison to wild-type *Yersinia* infected macrophages.** The protein name, Uniprot accession number, and molecular weight of identified proteins are shown. Moreover, experimental p-value calculated by using t-test, and experimental fold change value calculated based on the normalized and weighted spectral count are shown. Spectral counts for each biological replicate are also shown.

Supplementary Figure 1

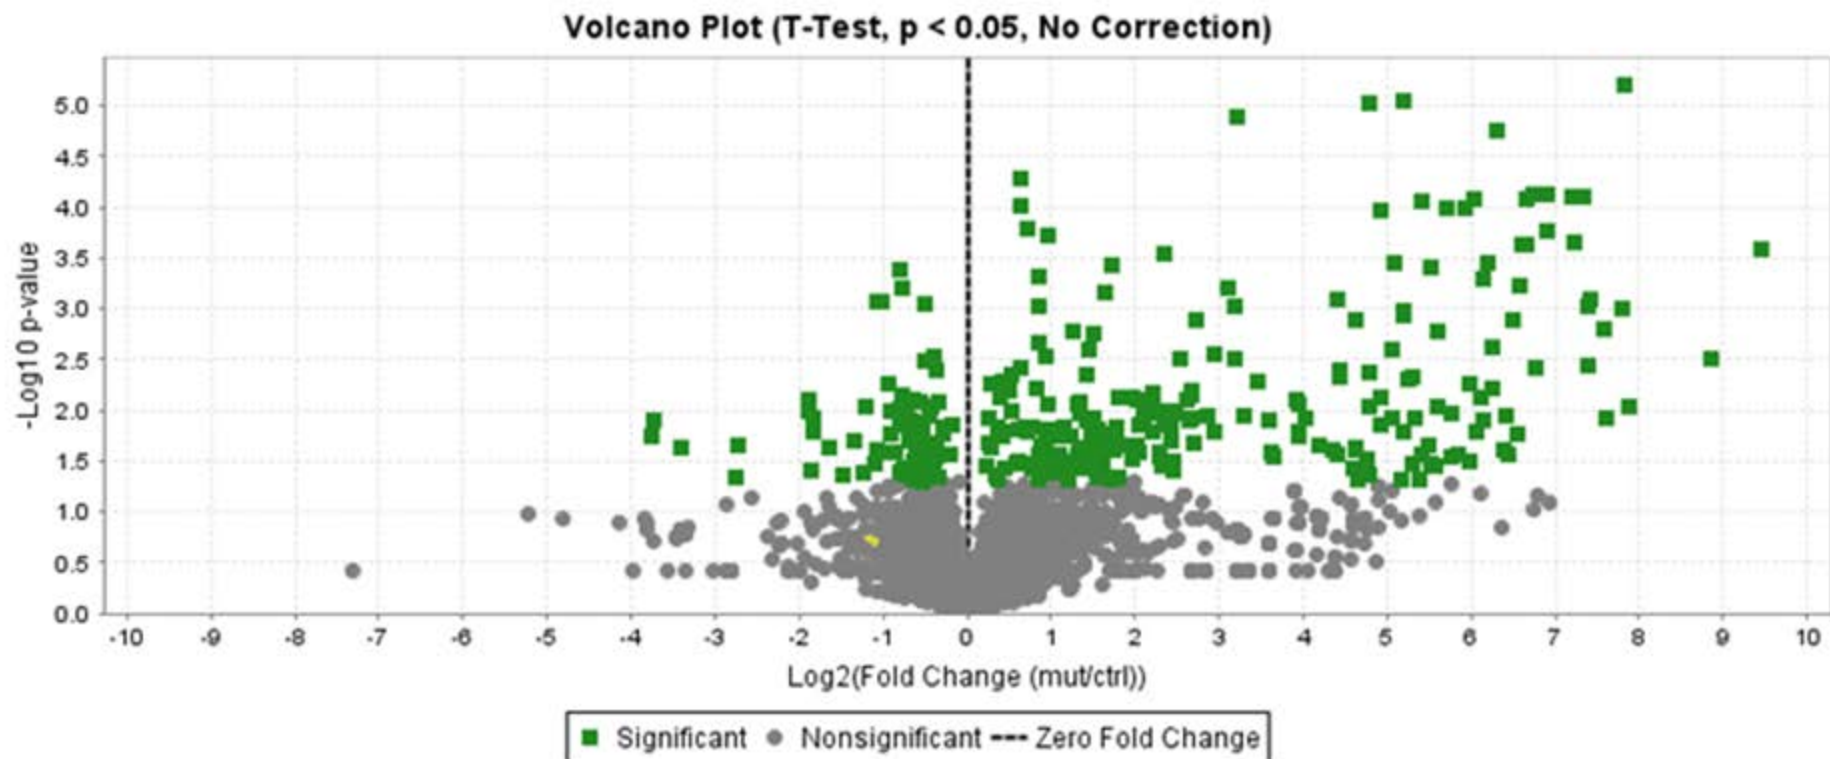

# Supplementary Figure 2

## A

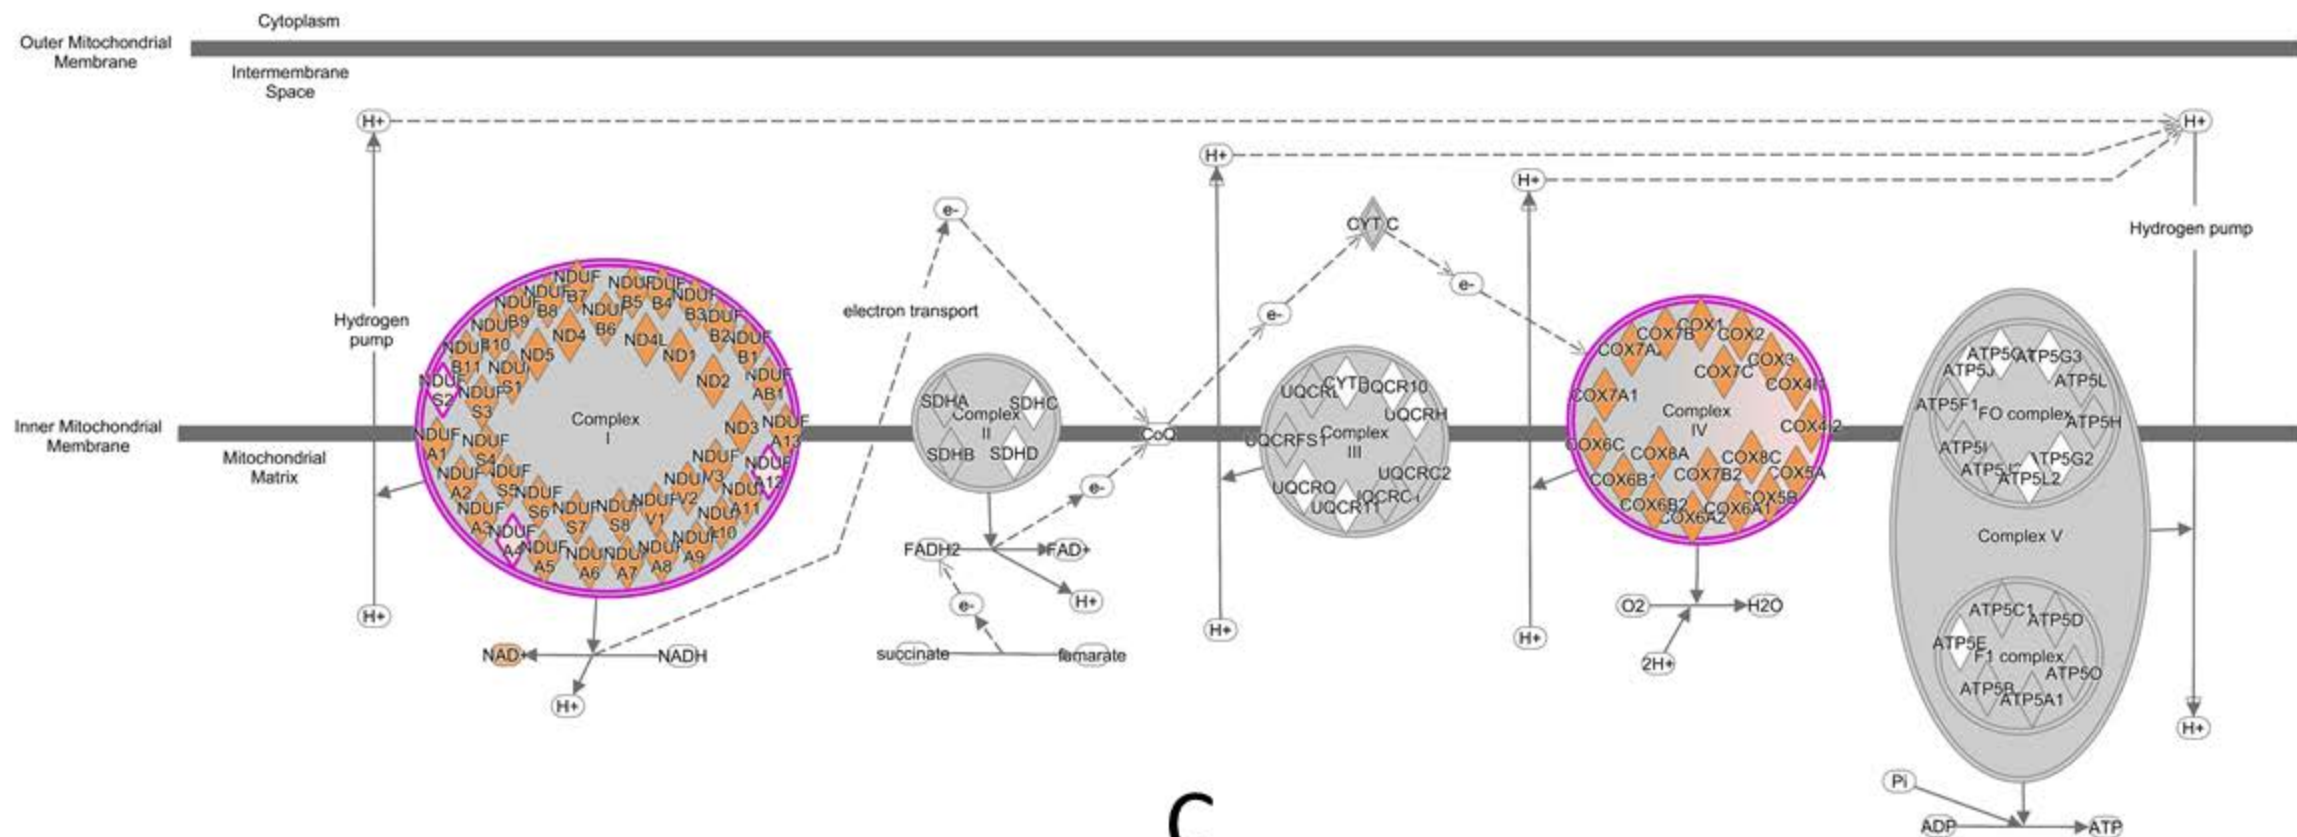

## B

| Symbol  | Entrez Gene Name                               | Gene Accessio | Expr p-value | Fold Change |
|---------|------------------------------------------------|---------------|--------------|-------------|
| COX17   | cytochrome c oxidase copper chaperone COX17    | Q14061        | 0.036        | 3.5         |
| NDUFA4  | NDUFA4 mitochondrial complex associated        | O00483        | 0.016        | 4.1         |
| NDUFA12 | NADH:ubiquinone oxidoreductase subunit A12     | Q9UI09        | 0.042        | 1.8         |
| NDUFS2  | NADH:ubiquinone oxidoreductase core subunit S2 | O75306        | 0.04         | 3.7         |

## C

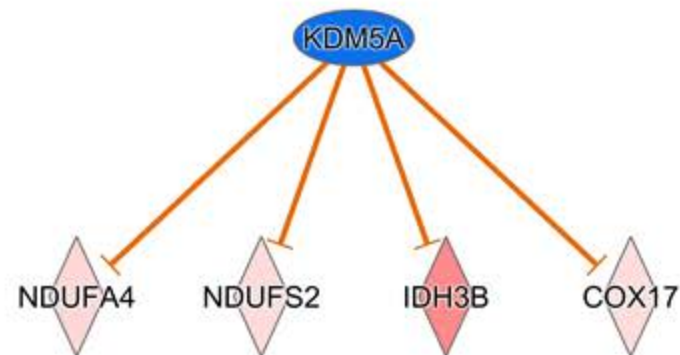

### Supplementary Figure 3

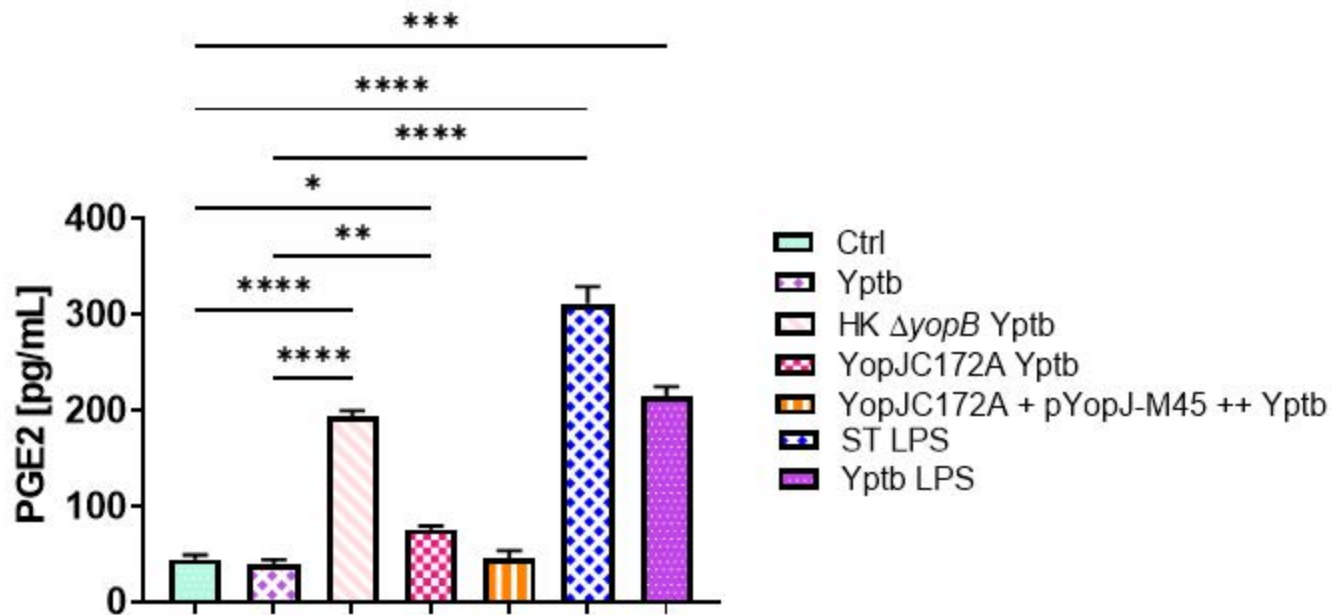

## Supplementary Figure 4

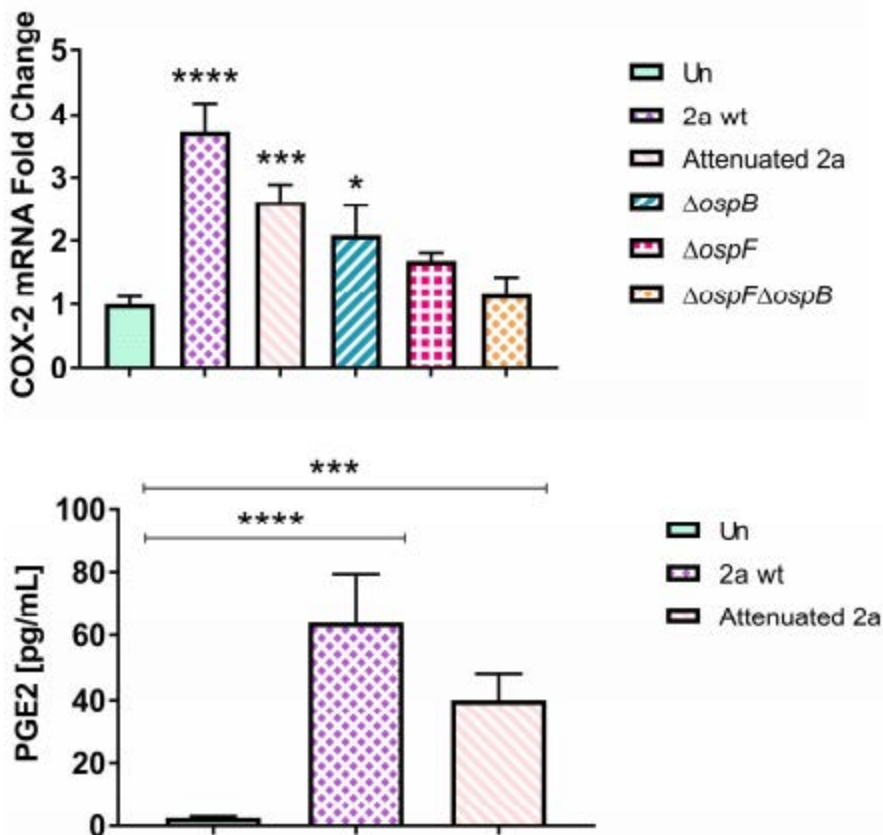

Supplement: spectrum00496-21_supp_3_seq3.pdf [file spectrum00496-21_supp_3_seq3.pdf]
